# Supplementary material
Source: ML conference proceedings conference paper supplement (https://openreview.net/forum?id=4wrB7Mo9_OQ)
Supplement: supplementary_material [file attachment]

## Appendices for the NeurIPS submission

### Resolving the data ambiguity for periodic crystals

The most important contribution is the introduction of the PDD invariants whose speed, continuity, and generic completeness in Problem 1.1 have no analogs among any state-of-the-art comparisons.

Many descriptors and similarities of crystals use only their finite subsets (only molecules or balls of a manually cut-off radius), which can have infinitely many non-isometric classes as shown in Fig. 4 (left). Any minimally useful descriptor should be invariant as in Problem 1.1a because any rigid motion cannot really change a solid crystalline material. A descriptor with false negatives cannot be used for comparison because equivalent objects can have different values of a non-invariant.

False negatives should be avoided first to detect different crystals  $S \not\cong Q$  due to  $I(S) \neq I(Q)$ . Only for an invariant  $I$ , it makes sense to avoid false positives by proving the completeness of  $I$  in condition (1.1b) to justify the converse implication:  $I(S) = I(Q) \Rightarrow S \cong Q$ . All ‘state-of-the-art’ comparisons fail to distinguish many periodic crystals [32, 49, 46], hence cannot define a metric satisfying the coincidence axiom:  $d(S, Q) = 0$  only for isometric crystals  $S \cong Q$ . Appendix A gives specific examples when past similarities RMSD [13] and 1-PXRD [54] fail the triangle axiom.

The traditional crystallography tools such as diffraction patterns and pair distribution function cannot distinguish any homometric crystals [48], even in dimension 1 as shown in Fig. 3 (right).

The simpler continuity in conditions (1.1c,d) is needed to quantify the similarity of (near-)duplicates but is failed by most invariants based on (reduced) cells or symmetry groups, see Fig. 2 (right).

Another inconvenience of the tools such as SOAP (Smooth Overlapped Atomic Positions [4]) and ACSF (Atom-Centered Symmetry Functions [5]) is their dependence on parameters such as cut-off radii that require manual choices. If these parameters change, then so do the underlying invariants.

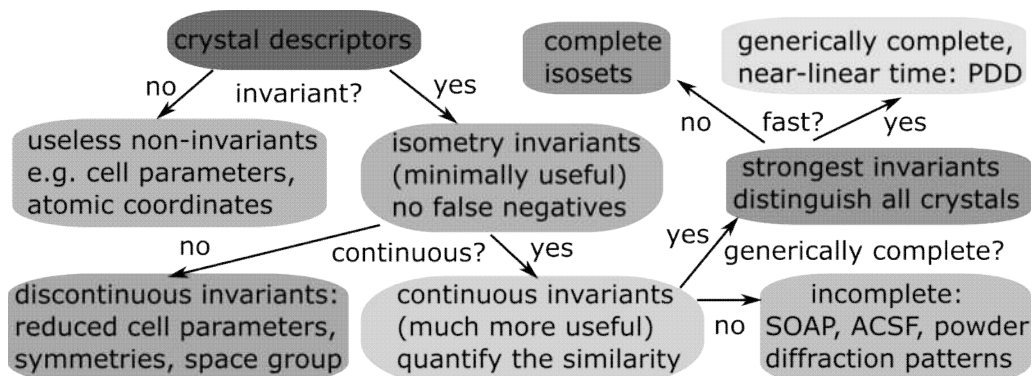

Figure 7: A hierarchy of crystal descriptors. A minimally useful invariant should have *no false negatives*. Most isometry invariants are discontinuous [60] or incomplete [46], hence fail conditions (1.1bcd) in Problem 1.1. The fastest and generically complete invariants are PDD in this paper.

Only the couple of recently discovered invariants satisfy the practically important conditions (1.1a,b,c,d,f): isosets [3] and PDD in this paper, see Fig. 7. The advantage of PDD is their near-linear time in Theorem 5.1. Pairwise comparisons of millions of real crystals are urgently needed to avoid the paper mills based on duplicates [7], whose new cases are reported in appendix A.

So all ‘state-of-the-art’ tools were too slow for large experiments such as 200B+ pairwise comparisons of all 660K+ periodic crystals in the Cambridge Structural Database (CSD). Hence it is possible to compare PDD with the past tools only on smaller datasets. The appendices below include

Appendix A: details of extra experimental comparisons with the state-of-the-art tools;

Appendix B: a pseudo-code with examples and instructions for the attached code;

Appendix C: rigorous proofs of all theoretical results in the main paper.

## 413 A Appendix A: details of experimental comparisons with the state-of-the-art

414 This appendix provides extra details for large-scale experimental comparisons of the new invariant  
 415 PDD with the most widely used past tools: the Root Mean Square Deviation (RMSD) for comparing  
 416 finite subsets [13] and 1-PXRD similarity based on powder X-ray diffraction patterns. The popularity  
 417 of these tools does not help to resolve the key question for crystals : ‘the same or different?’ [54].

418 The key advantage of Pointwise Distance Distributions (PDD) for searching (near-)duplicates and  
 419 nearest neighbors in huge datasets is their hierarchical nature. The weighted averages of columns in  
 420 the PDD matrix form the simpler AMD vectors (Average Minimum Distances), which can be quickly  
 421 subtracted and compared. Since the Earth Mover’s Distance (EMD) between PDD matrices can be  
 422 only larger than the  $L_\infty$  distance between their AMD vectors by Theorem 4.2, it suffices to compute  
 423 the slower EMD only on pairs of crystals whose AMD vectors are very close to each other.

424 Any crystal dataset can be further organized into hierarchical families whose levels are parameterized  
 425 by the number  $i$  of atomic neighbors. The  $i$ -th level of this hierarchy can consist of disjoint or  
 426 overlapping clusters of crystals that have close values of the  $i$ -th coordinate  $\text{AMD}_i$  in the vector  
 427  $\text{AMD}(S; k) = (\text{AMD}_1, \dots, \text{AMD}_k)$ . Indeed,  $L_\infty(\text{AMD}(S; k), \text{AMD}(Q; k)) \geq |\text{AMD}_i(S) -$   
 428  $\text{AMD}_i(Q)|$ . Hence, any crystals with distant values of  $\text{AMD}_i$  cannot have close AMD vectors.

429 We use the public dataset of 5679 T2 crystals base on the same T2 molecule and predicted by 12-week  
 430 supercomputer simulations [38]. Only five were synthesized: T2- $\alpha$ , T2- $\beta$ , T2- $\gamma$ , T2- $\delta$ , T2- $\varepsilon$ . The  
 431 supplementary folders include CIFs of all mentioned crystals, which can be opened by any text editor  
 432 and visualised by the free software Mercury. Fig. 8 shows 10 PDD curves of T2- $\varepsilon$  corresponding  
 433 to the 10 isometrically unique atomic positions within the T2 molecule. The rotation through  $120^\circ$   
 434 around an axis keeps the T2 molecule and the whole infinite crystal T2- $\varepsilon$  invariant, while the three  
 435 oxygen atoms shown in red simply rotate their positions. Hence all oxygen atoms have the same  
 436 ordered distances to their neighbors and their PDD curves coincide. The same conclusion holds for six  
 437 nitrogens whose positions are isometrically equivalent in T2. Carbon atoms have five non-isometric  
 438 positions, which generate five unique PDD curves in Fig. 8. All 10 PDD curves provide a finer  
 439 classification of atomic types not only by chemical elements, but by their geometric positions within  
 440 a molecule. For every atom, the first distance for  $k = 1$  is the bond distance to its closest neighbor,  
 441 see the zoomed beginnings of PDD curves. Though chemical elements can be included into the PDD  
 442 matrix as an extra column, the above shows that the PDD invariants can infer this chemistry.

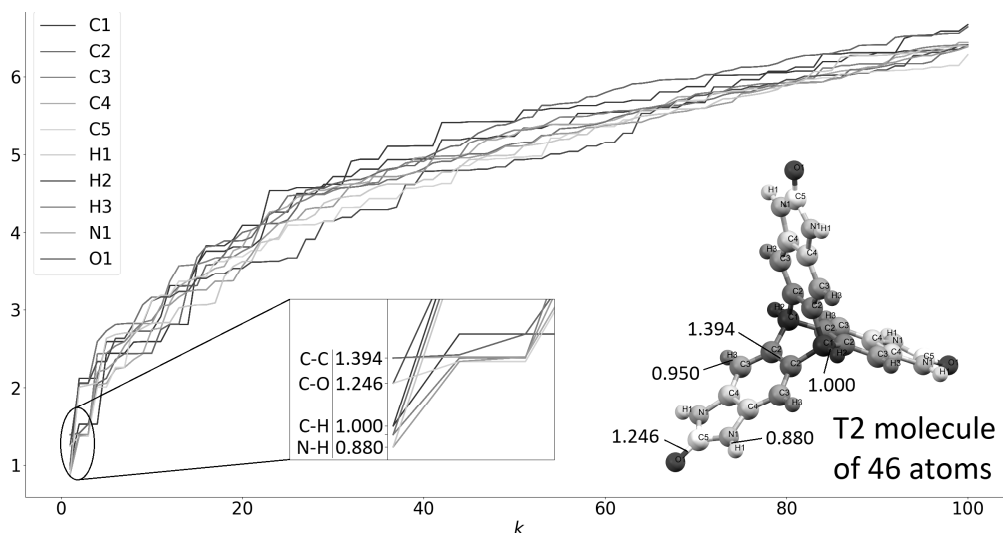

Figure 8: Each curve shows distances  $d_k$  from one atom of a T2 molecule to  $k$ -th neighbor in the T2- $\varepsilon$  crystal. The 46 atoms form 10 groups, one for each atom in the asymmetric unit: three oxygens form one type with the PDD curve in red, 23 carbons have 5 non-isometric positions in T2 with PDD curves in 5 shades of gray. The zoomed part shows the initial bond distances in  $\text{\AA} = 10^{-10} \text{ m}$ .

443 A key challenge in visualization is to justifiably represent invariant data in a simple form. Past  
 444 algorithms such as t-SNE [59] and UMAP [42] are stochastic and can produce different outputs from  
 445 repeated runs on the same input. Hence we used the more recent deterministic TreeMap [50] to  
 446 draw a Minimum Spanning Tree (MST). Informally, any MST can be considered as an optimal road  
 447 network between cities. Such a network can be drawn in many different ways; the most valuable new  
 448 data is the distances between PDDs of crystals but the MST is drawn only for visualization. Similarly,  
 449 positions of cities and distances between them are more important than a sketch of a road network.

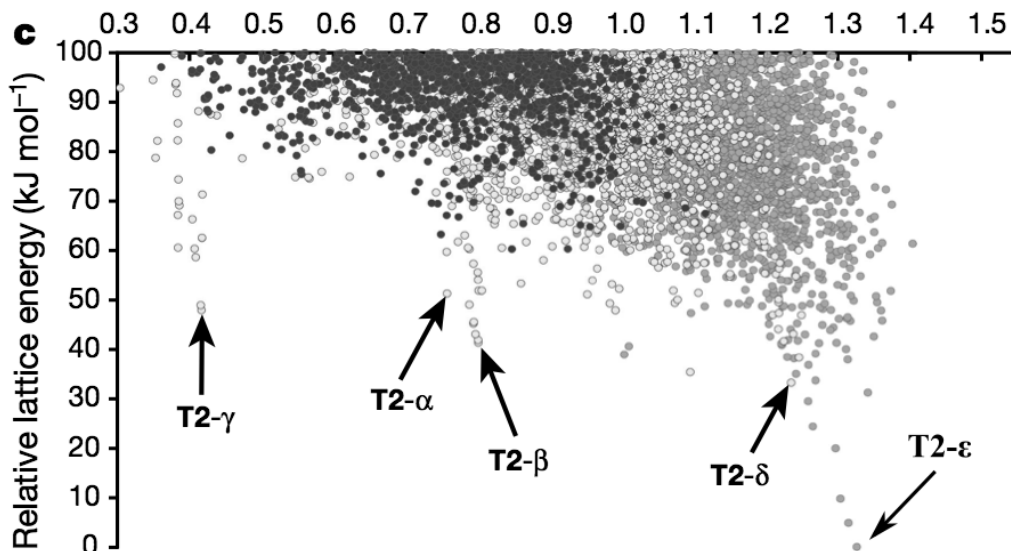

Figure 9: State-of-the-art visualization of a CSP dataset, modified from Fig. 2d in [23]. Every  
 predicted crystal has two coordinates (density, energy). The arrows show the predicted crystals that  
 were manually matched to the five experimental crystals T2- $\alpha$ , T2- $\beta$ , T2- $\gamma$ , T2- $\delta$ , T2- $\epsilon$ .

450 Fig. 10 illustrates key advantages of the invariant-based visualization in the right picture compared  
 451 with the energy landscape in the left picture extracted from the state-of-the-art [23] in Fig. 9. Briefly,  
 452 the MST based on stronger isometry invariants  $PDD(S; 100)$  provides more information about crystal  
 453 similarity than the cloud of points (density, energy). In the past, simulated versions were manually  
 454 searched to match experimental crystals only by density. Measuring the energy of an experimental  
 455 crystal needs an explosion disintegrating this crystal. For the experimental crystal T2- $\delta$ , dozens of  
 456 simulated crystals were searched in the vertical strip in the left picture of Fig. 10. Simulated crystal  
 457 14 was visually chosen in [23] as the best match for T2- $\delta$ .

458 The new PDD invariant automates the search for closest crystals, because PDD can be computed for  
 459 all types of simulated and experimental crystals. The MST in the right picture of Fig. 10 includes  
 460 T2- $\delta$  as a red dot close to the near duplicate crystals 14 and 15, which were not filtered out by  
 461 past tools because of very different unit cells and motifs in Fig. 6. There were many other pairs  
 462 of crystals with almost identical values of (density, energy), for example crystals 5920 and 0049,  
 463 whose structures were found away from each other in the MST. When comparing this pair by the  
 464 COMPACK algorithm, only one molecule is matched in Table 4. The resulting zero value of RMSD  
 465 only means that crystals 5920 and 0049 are different (no similarity found), while EMD provides a  
 466 proper distance. Fig. 10 (right) shows crystals 5920, 0049 in different branches of the MST.

467 The 4950 comparisons of 100 crystals by COMPACK took 3 hours 53 min (2.825 sec per comparison),  
 468 which is 3 orders of magnitude slower than EMD on PDD invariants. Table 3 says that over half  
 469 the time (56%) only one molecule is matched, which means that no similarity was found between  
 470 crystals based on identical molecules. In fact, in 95% of cases three or fewer molecules are matched,  
 471 which is also considered a non-match for the default number of 15 maximum matched molecules.  
 472 The number of matched molecules rarely exceed 10 (0.5%), and only 6 comparisons matched 15/15.

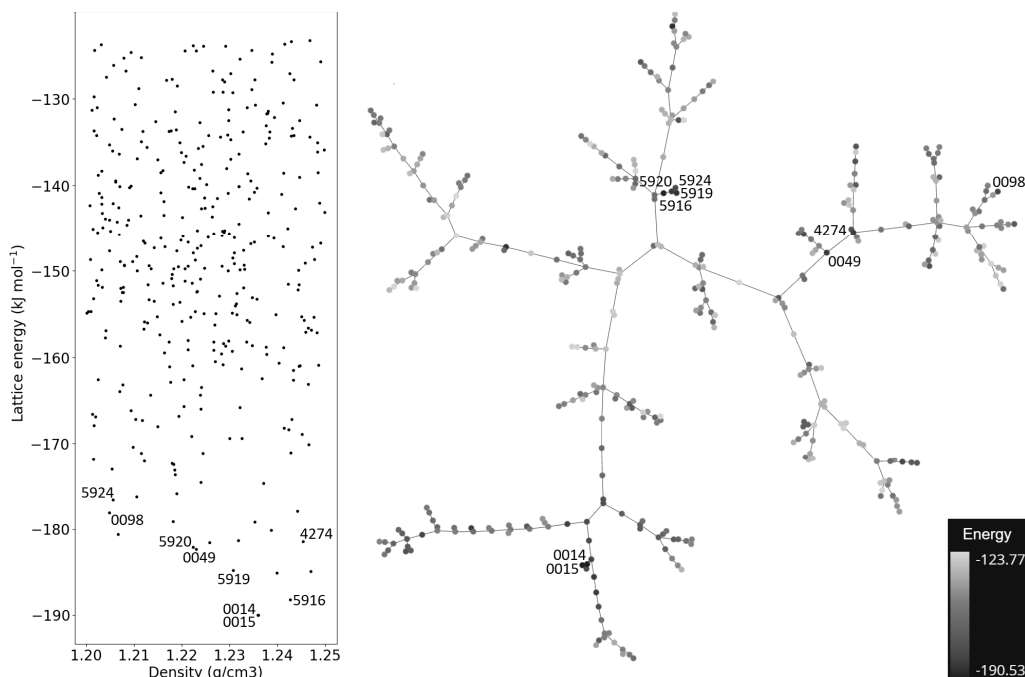

Figure 10: **Left:** a vertical ‘strip’ of the energy landscape from Fig. 9 in the density range  $[1.2, 1.25]$  around the density of the experimental crystal T2- $\delta$ . Some of the lowest energy crystals are highlighted by their IDs in the T2 dataset reported in [23]. **Right:** MST of the simulated crystals on the left plus the experimental crystal T2- $\delta$  in red, based on  $PDD(S; 100)$ . All simulated crystals are colored by lattice energy according to the key in the bottom right corner.

Table 4: The traditional COMPACK algorithm [13] measures similarity by attempting to match up to 15 (by default) molecules from two crystals. The low values 1, 2, 3 (of 15) mean that only a few molecules could be aligned in the two crystals with a small enough Root Mean Square Deviation (RMSD), so this is not considered a match.

|      | 0014 | 0015 | 0049 | 0098 | 4274 | 5916 | 5919 | 5920 | 5924 |
|------|------|------|------|------|------|------|------|------|------|
| 0014 | 15   | 15   | 3    | 1    | 1    | 1    | 2    | 2    | 2    |
| 0015 | 15   | 15   | 3    | 1    | 1    | 1    | 2    | 2    | 2    |
| 0049 | 3    | 3    | 15   | 1    | 10   | 2    | 1    | 1    | 1    |
| 0098 | 1    | 1    | 1    | 15   | 1    | 1    | 1    | 1    | 1    |
| 4274 | 1    | 1    | 10   | 1    | 15   | 2    | 2    | 2    | 2    |
| 5916 | 1    | 1    | 2    | 1    | 2    | 15   | 10   | 10   | 10   |
| 5919 | 2    | 2    | 1    | 1    | 2    | 10   | 15   | 15   | 15   |
| 5920 | 2    | 2    | 1    | 1    | 2    | 10   | 15   | 15   | 15   |
| 5924 | 2    | 2    | 1    | 1    | 2    | 10   | 15   | 15   | 15   |

We also compare the new invariant to powder X-ray diffraction patterns (PXRD), a popular way of measuring similarity between structures. We note that unlike Earth mover’s distance between PDDs, the ‘distance’ between PXRDs is not a proper metric on the space of crystals, and so is not appropriate to use it to continuously explore the space. Our experiments show that 1-PXRD (since a PXRD score of 1 means identical) fails to satisfy the triangle inequality on the T2 dataset over 8% of the time, and the RMSD values given by COMPACK similarly fail to satisfy this axiom, see Table 5.

Our second dataset has all 12576 structures in the Drug Subset [12] of the Cambridge Structural Database (CSD). Though the CSD is the world’s largest collection of more than 1.1M crystals, it is effectively a huge folder of Crystallographic Information Files (CIF) with limited search functions, for example by a chemical composition.

| Crystal 1    | Crystal 2      | RMSD  | Crystal 1 | Crystal 2 | 1-PXRD |
|--------------|----------------|-------|-----------|-----------|--------|
| T2- $\gamma$ | T2- $\alpha$   | 2.805 | T2-0001   | T2-0029   | 0.187  |
| T2- $\gamma$ | T2- $\epsilon$ | 0.184 | T2-0001   | T2-5333   | 0.110  |
| T2- $\alpha$ | T2- $\epsilon$ | 0.231 | T2-0029   | T2-5333   | 0.0683 |

Table 5: Triples of crystals where the commonly used tools RMSD and PXRD fail the triangle inequality axiom required of a proper metric. The CIFs are in the supplementary materials.

483 The CSD Drug subset only includes small-molecule crystal structures containing a drug molecule,  
 484 typically smaller than the T2 molecule. Since larger than necessary values of  $k$  don’t affect distances  
 485 to closer neighbors, we tried  $k = 100$  and  $k = 200$  for the CSD Drug Subset.

486 After computing  $PDD(S; k)$ , we use a standard EMD algorithm for distances between the distribu-  
 487 tions. A Minimum Spanning Tree can be computed from a smaller graph on PDD invariants not  
 488 requiring all pairwise distances. Since distances asymptotically approach  $PPC(S) \sqrt[3]{k}$ , we used the  
 489 instantly computable Point Packing Coefficient  $PPC(S)$  to find 3000 neighbors for each of 12576  
 490 crystals. For  $k = 200$ , the computations of  $12576 \times 3000$  EMD distances (excluding all repetitions)  
 491 took 7 hours 39 min (1.238 ms per comparison, 2.19 sec per crystal for all 3000 neighbors).

492 **The key contribution** is the new invariant data for edge-lengths of the MST, which can be visualized  
 493 by TreeMap [50] or any other graph drawing algorithm. The continuity and invariance of Pointwise  
 494 Distance Distributions in Theorems 3.2 and 4.3 guarantee that any crystal data analysis based on  
 495 these invariants is theoretically justified. Since a Minimum Spanning Tree has no cycles, some close  
 496 crystals might appear at terminal vertices of distant branches, which could be connected to form a  
 497 cycle. Drawing a graph with cycles will require more sophisticated algorithms. However, the new  
 498 invariants can be used for a justifiable search of similar crystals without visualization.

499 We also have interactive versions of full Minimum Spanning Trees of the T2 dataset and CSD drug  
 500 subset. In any Javascript-enabled browser one can zoom these TreeMaps, color the vertices by  
 501 properties, hover over any vertex to get more information. Though aspirin and paracetamol are  
 502 chemically different, their crystal structures are found in close branches confirming their similar  
 503 properties.

504 The ‘structure’ of a crystal was previously measured by only one continuous isometry invariant: the  
 505 physical density equal to the weight of atoms within a unit cell, divided by the cell volume. All other  
 506 descriptors are either non-invariants, e.g. powder diffraction patterns depend on various thresholds  
 507 and are not always reliable, or are discontinuous under perturbations, e.g. symmetry groups.

508 The main contribution is replacing the single-value density by much stronger more isometry invariants  
 509 PDD. Comparing crystals by only their densities was the latest ‘state-of-the-art’ in [23], where 5  
 510 forms of 9 experimental crystals were initially matched to dozens of simulated crystals with close  
 511 densities. Then hundreds of crystals were visually inspected to select the five matches in Fig. 9.

512 Now a ‘structure’ of a crystal can be much better represented by many more numerical invariants  
 513 in PDD. Fig. 11 is the first justified map of (a discretely sampled) space of T2 crystals, because  
 514 the underlying distance between PDD invariants satisfies all metric axioms and continuity under  
 515 perturbations by [52] and Theorem 4.3.

516 The map in Fig. 11 shows a Minimum Spanning Tree built on 5679+9 crystals. Each crystal is  
 517 a vertex. The distance between any crystals is the Earth Mover’s distance between the first order  
 518 PDD invariants. The most interesting vertices in the T2 map are experimental crystals shown in  
 519 red, because their energies are impractical to measure. The map shows experimental crystals with  
 520 simulated predictions for the first time, because past plots such as in Fig. 9 need all energy values.

521 Fig. 11 is a substantial advancement in visualizing crystal datasets, because the underlying invariants  
 522  $PDD(S; k)$  are much more informative than a single-value density. The nine experimental crystals  
 523 (red dots) clearly split into five groups marked by T2- $\alpha$ , T2- $\beta$ , T2- $\gamma$ , T2- $\delta$ , T2- $\epsilon$ . These nine  
 524 experimental crystals have no known energies and cannot appear in the past energy landscapes. The  
 525 four red dots at the very top represent slightly different forms of a T2- $\gamma$  crystal synthesized at different  
 526 temperatures.

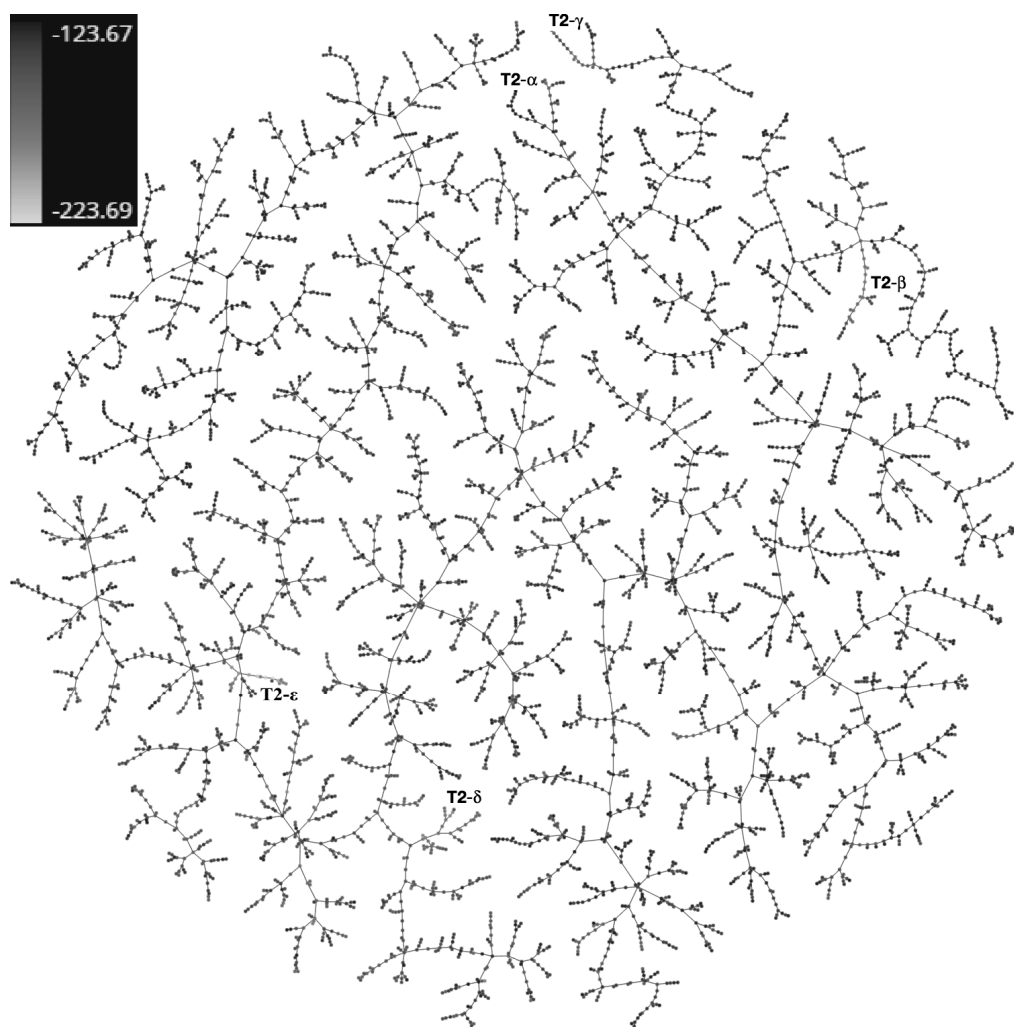

Figure 11: A Minimum Spanning Tree of 9+5679 T2 crystals drawn by TreeMap [50]. The distance between any crystals  $S, Q$  is the  $\text{EMD}(\text{PDD}(S; 125), \text{PDD}(Q; 125))$ . The color bar in the top left corner shows energy values. The minimum of -223.69 kJ/mol corresponds to 0 in Figure 9. Nine experimental crystals, which form the families T2- $\alpha$ , T2- $\beta$ , T2- $\gamma$ , T2- $\delta$ , T2- $\epsilon$ , are shown in red, because their energies are not experimentally measured (a crystal is disintegrated only by a blow up).

527 The map can be interactively explored by opening the file T2L\_PDD125\_TMap.html from the  
 528 supplementary materials in any browser in the same folder with the corresponding JavaScript files. In  
 529 the interactive version one can color vertices by a property, which can be changed in the drop-down  
 530 menu in the bottom right corner. For example, all crystals with low energies appear in yellow colors.

531 In Fig. 11 six of nine experimental T2 crystals have the codes DEBXIT01...06, though they split  
 532 into two groups (unique polymorphs): four nearly identical crystals T2- $\gamma$  and two nearly identical  
 533 crystals T2- $\beta$ . Our final experiment on all 229K molecular organic crystals found thousands of such  
 534 pairs in the Cambridge Structural Database.

535 In addition to the five pairs of isometrically identical crystals discussed in section 6, a search on the  
 536 CSD using PDD on molecular centers instead of atomic centers revealed nine pairs of structures  
 537 which were almost identical, listed in table 6. The supplementary code includes a script to compare  
 538 the previously mentioned five pairs by PDD, however the code to compute molecular centers is

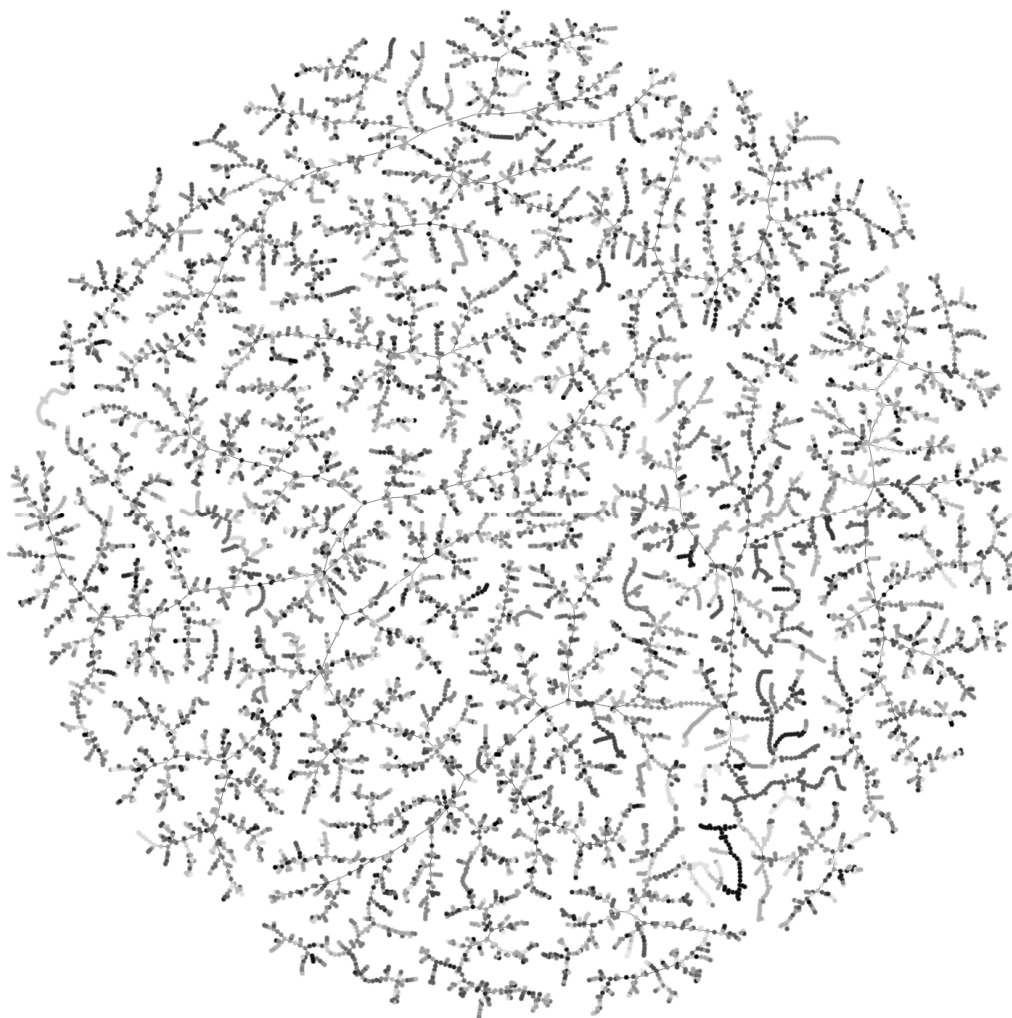

Figure 12: A Minimum Spanning Tree of 12576 structures in the Drug Subset of the Cambridge Structural Database. The distance between any crystals  $S, Q$  is  $\text{EMD}(\text{PDD}(S; 100), \text{PDD}(Q; 100))$ . All structures from the same family are shown in one random color.

private, so it was not possible to include a script reproducing the results below. Instead, the .CIFs for each of these crystals is included in the folder `identical_by_mol_centers` and can be manually inspected (or opened in visualization software) to see the similarity.

## B Appendix B: examples and instructions for the attached code and data files

### B.1 Pseudocode for computing Pointwise Distance Distributions (PDD)

The algorithm accepts any periodic point set  $S \subset \mathbb{R}^n$  in the form of a unit cell  $U$  and a motif  $M \subset S$ . The cell is given as a square  $n \times n$  matrix with basis vectors in the columns, and the motif points in Cartesian form lying inside the unit cell. For dimension 3, the typical Crystallographic Information File (CIF) with six unit cell parameters and motif points in terms of the cell basis is easily converted to this format. Otherwise, the unit cell and motif points can be given directly, in any dimension.

Specifically, the PDD function's interface is as follows:

Input:

| CSD ID 1 | CSD ID 2 | EMD ( $k = 100$ )     |
|----------|----------|-----------------------|
| ADESAG   | REWPOB   | $1.45 \times 10^{-5}$ |
| ROWBIQ   | TUHMOA   | $9.00 \times 10^{-4}$ |
| BESNOC01 | XILXIA   | $3.93 \times 10^{-3}$ |
| GIMHOA   | XORCOX   | $5.63 \times 10^{-3}$ |
| FUQMAG   | GAVFEP   | $6.73 \times 10^{-3}$ |
| COXJIJ   | DUPZIJ   | $6.79 \times 10^{-3}$ |
| HAPNOE   | HAPNUK   | $7.15 \times 10^{-3}$ |
| LETYAM   | UKUWUT   | $8.66 \times 10^{-3}$ |
| DUCPUN   | XUWMEI01 | $9.88 \times 10^{-3}$ |

Table 6: Selection of pairs of structures from the CSD with exactly zero EMD when compared by molecular centers. The closest pair ADESAG and REWPOB have identical fractional coordinates except for one difference at the fifth decimal place, a difference 100 times smaller than the typical threshold for considering two sites identical (0.001Å).

- `motif`: array shape  $(m, n)$ . Coordinates of motif points in Cartesian form.
- `cell`: array shape  $(n, n)$ . Represents the unit cell in Cartesian form.
- `k`: `int`  $> 0$ . Number of columns to return in  $\text{PDD}(S; k)$ .

Output:

- `pdd`: array with  $k + 1$  columns.

Before giving the pseudocode, we outline some of the key objects and functions in use:

- A generator `g`, which creates points from the periodic set  $S$  to find distances to,
- KDTrees (canonically  $k$  is the dimension here, in our case it's denoted  $n$ ), data structures designed for fast nearest-neighbour lookup in  $n$ -dimensional space.

Once `g` is constructed, `next(g)` is called to get new points from the infinite set  $S$ . The first call returns all points in the given unit cell (i.e. the motif), and successive calls return points from unit cells further from the origin in a spherical fashion.

A KDTree is constructed with a point set  $T$ , then queried with another  $Q$ , returning a matrix with distances from all points in  $Q$  to their nearest neighbors (up to some given number,  $k$  below) in  $T$ , as well as the indices of these neighbors in  $T$ .

The functions `collapse_equal_rows` and `lexsort_rows`, which perform the collapsing and lexicographical sorting steps of computing PDD (Definition 3.1) respectively, are assumed to be implemented elsewhere.

The following pseudocode finds  $\text{PDD}(S; k)$  for a periodic set  $S$  described by `motif` and `cell`:

```
def PDD(motif, cell, k):
    cloud = [] # contains points from S
    g = point_generator(motif, cell)

    # at least k points will be needed
    while len(cloud) < k:
        points = next(g)
        cloud.extend(points)

    # first distance query
    tree = KDTree(cloud)
    D_, inds = tree.query(motif, k)
    D = zeros_like(D_)
```



```

585     # repeat until distances don't change,
586     # then all nearest neighbors are found
587     while not D == D_:
588         D = D_
589         cloud.extend(next(g))
590         tree = KDTree(cloud)
591         D_, inds = tree.query(motif, k)
592
593     pdd = collapse_equal_rows(D_)
594     pdd = lexsort_rows(pdd)
595     return pdd

```

## 596 B.2 Instructions for the attached PDD code and specific examples

597 A Python script implementing Pointwise Distance Distributions along with examples can be found  
598 in the zip archive included in this submission. Python 3.7 or greater is required. The dependency  
599 packages are NumPy (< 1.22), SciPy ( $\geq 1.6.1$ ), numba ( $\geq 0.55.0$ ) and ase ( $\geq 3.22.0$ ); if you do  
600 not wish to affect any currently installed versions on your machine, create and activate a virtual  
601 environment before the following.

602 Unzip the archive and in a terminal navigate to the unzipped folder. Install the requirements by  
603 running `pip install -r requirements.txt`. Then run `python` followed by the example script  
604 of choice, and then any arguments (outlined below), e.g.

```

605     $ python kite_trapezium_example.py
606
607     trapezium: [(0, 0), (1, 1), (3, 1), (4, 0)]
608     PDD:
609     [[0.5      1.41421356 2.      3.16227766]
610      [0.5      1.41421356 3.16227766 4.      ]]
611
612     kite: [(0, 0), (1, 1), (1, -1), (4, 0)]
613     PDD:
614     [[0.25      1.41421356 1.41421356 4.      ]
615      [0.5      1.41421356 2.      3.16227766]
616      [0.25      3.16227766 3.16227766 4.      ]]
617
618     EMD between trapezium and kite: 0.874032

```

619 List of included example scripts and their parameters:

- 620 • `kite_trapezium_example.py` prints the PDDs of the finite 4-point sets  $K$  (kite) and  $T$   
621 (trapezium) in Fig. 3, along with their Earth mover's distance.
- 622 • `1D_sets_example.py` shows that the 1D periodic sets in Fig. 3 are distinguished by their  
623 PDDs for any parameter  $0 < r \leq 1$ . This script requires the parameter  $r$  to be passed after  
624 the file name, e.g. `'python 1D_sets_example.py 0.5'`.
- 625 • `T2_14_15_example.py` compares the crystals shown in Fig. 6, whose original .CIFs are  
626 included. This optionally accepts the parameter  $k$  controlling the number of columns in the  
627 computed PDD, e.g. `'python T2_14_15_example.py --k 50'` compares by PDD with  
628  $k = 50$ . If not included,  $k = 100$  is used as the default.
- 629 • `CSD_duplicates_example.py` computes and compares the PDDs of the 5 pairs of iso-  
630 metric crystals from the CSD discussed in section 6, giving distances of exactly zero. This  
631 optionally accepts the parameter  $k$  controlling the number of columns in the computed PDD,  
632 in the same way as `T2_14_15_example.py` above.

633 If you wish to run the code on your own sets or CIF files, you can use the functions exposed in the  
634 main script `pdd.py`. Use `pdd.read_cif()` to parse a cif and return a crystal, or define one manually  
635 as a tuple (`motif`, `cell`) with NumPy arrays. Pass this as the first argument to `pdd.pdd()` with  
636 an integer  $k$  as the second to compute the PDD. Pass two PDDs to `pdd.emd()` to calculate the Earth

637 mover's distance between them. For finite sets, the function `pdd.pdd_finite()` accepts just one  
 638 argument, an array containing the points, and returns the PDD.

## 639 C Appendix C: rigorous proofs of Theorems 3.2, 4.2, 4.3, 4.4, 5.1.

640 *Proof of Theorem 3.2.* For any periodic point set  $S \subset \mathbb{R}^n$ , we first show scaling up a unit cell  $U$  to a  
 641 non-primitive cell keeps  $\text{PDD}(S; k)$  invariant. It suffices to scale up a cell  $U$  by a factor of  $l$ , say  
 642 along the first basis vector  $\vec{v}_1$  of  $U$ , then the number  $m$  of motif points of  $S$  is multiplied by  $l$ .

643 Then  $D(S; k)$  from Definition 3.1 has the larger size  $lm \times k$  but (due to periodicity) consists of  
 644  $l$ -tuples of identical rows of distances from points  $p + i\vec{v}_1$ ,  $i = 0, \dots, l-1$ , to their  $k$  neighbors  
 645 within  $S$ . Hence  $\text{PDD}(S; k)$  remains invariant, under all isometries due to the result below.

646 Now we show that the matrix  $D(S; k)$  from Definition 3.1, hence  $\text{PDD}(S; k)$ , is independent of a  
 647 primitive unit cell. Let  $U, U'$  be primitive cells of a periodic set  $S \subset \mathbb{R}^n$  with a lattice  $\Lambda$ . Any point  
 648  $q \in S \cap U'$  can be translated by some  $\vec{v} \in \Lambda$  to a point  $p \in S \cap U$  and vice versa. These translations  
 649 establish a bijection between the motifs  $S \cap U \leftrightarrow S \cap U'$  and preserve distances. So  $\text{PDD}(S; k)$  is  
 650 the same for both  $U, U'$ .

651 Now we prove that  $\text{PDD}(S; k)$  is preserved by any isometry  $f : S \rightarrow Q$ . Any primitive cell  $U$  of  $S$   
 652 is bijectively mapped by  $f$  to the unit cell  $f(U)$  of  $Q$ , which should be also primitive. Indeed, if  $Q$  is  
 653 preserved by a translation along a vector  $\vec{v}$  that doesn't have all integer coefficients in the basis of  
 654  $f(U)$ , then  $S = f^{-1}(Q)$  is preserved by the translation along  $f^{-1}(\vec{v})$ , which doesn't have all integer  
 655 coefficients in the basis of  $U$ , so  $U$  was non-primitive. Since  $U$  and  $f(U)$  have the same number of  
 656 points from  $S$  and  $Q = f(S)$ , the isometry  $f$  gives a bijection between the motifs of  $S, Q$ .

657 For any finite or periodic sets  $S, Q$ , since  $f$  maintains distances, every list of ordered distances from  
 658  $p_i \in S \cap U$  to its first  $k$  nearest neighbors in  $S$ , coincides with the list of the ordered distances from  
 659  $f(p_i)$  to its first  $k$  neighbors in  $Q$ . These coincidences of distance lists give  $\text{PDD}(S; k) = \text{PDD}(Q; k)$   
 660 after collapsing identical rows.  $\square$

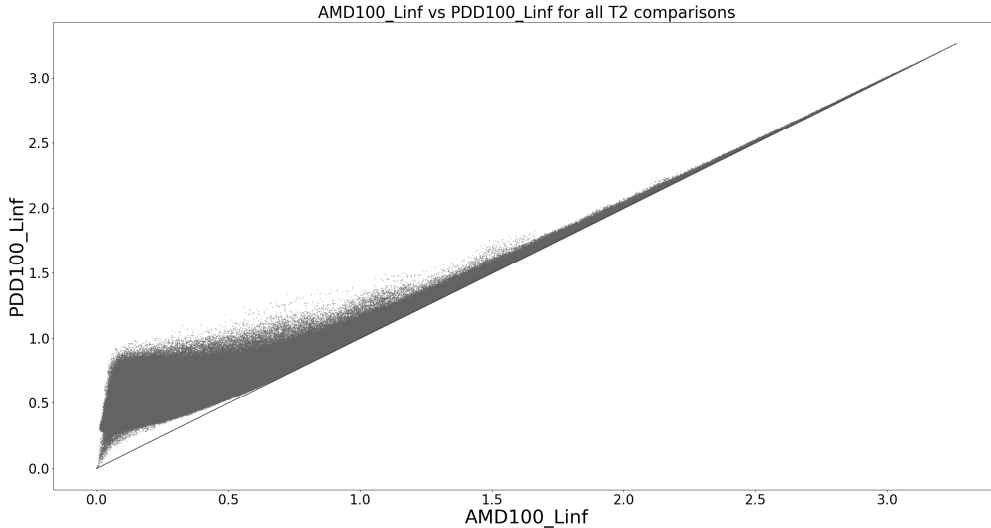

Figure 13: Illustration of Theorem 4.2. The coordinates of each point are the  $L_\infty$ -based distances between  $\text{AMD}(S; 100)$ ,  $\text{AMD}(Q; 100)$  and  $\text{PDD}(S; 100)$ ,  $\text{PDD}(Q; 100)$  for all pairs  $S, Q$  of 5679 T2 crystals reported in [23].

661 *Proof of Theorem 4.2.* Considering  $\text{PDD}(S; k)$  as a weighted distribution of rows,  $\text{AMD}(S; k)$  is  
 662 its centroid from [14, section 3]. The lower bound follows from [14, Theorem 1].  $\square$

663 **Lemma C.1.** For some  $\varepsilon > 0$ , let  $g : S \rightarrow Q$  be a bijection between finite or periodic sets such  
664 that  $|a - g(a)| \leq \varepsilon$  for all  $a \in S$ . Then, for any  $i \geq 1$ , let  $a_i \in S$  and  $b_i \in Q$  be the  $i$ -th nearest  
665 neighbors of points  $a \in S$  and  $b = g(a) \in Q$ , respectively. Then the Euclidean distances from the  
666 points  $a, b$  to their  $i$ -th neighbors  $a_i, b_i$  are  $2\varepsilon$ -close to each other, i.e.  $||a - a_i| - |b - b_i|| \leq 2\varepsilon$ . ■

667 *Proof.* Shifting the point  $g(a)$  back to  $a$ , assume that  $a = g(a)$  is fixed and all other points change  
668 their positions by at most  $2\varepsilon$ . Assume by contradiction that the distance from  $a$  to its new  $i$ -th  
669 neighbor  $b_i$  is less than  $|a - a_i| - 2\varepsilon$ . Then all first new  $i$  neighbors  $b_1, \dots, b_i \in Q$  of  $a$  belong to  
670 the open ball with the center  $a$  and the radius  $|a - a_i| - 2\varepsilon$ .

671 Since the bijection  $g$  shifted every  $b_1, \dots, b_i$  by at most  $2\varepsilon$ , their preimages  $g^{-1}(b_1), \dots, g^{-1}(b_i)$   
672 belong to the open ball with the center  $a$  and the radius  $|a - a_i|$ . Then the  $i$ -th neighbor of  $a$  within  $S$   
673 is among these  $i$  preimages, i.e. the distance from  $a$  to its  $i$ -th nearest neighbor should be strictly less  
674 than the assumed value  $|a - a_i|$ . We get a contradiction assuming that the distance from  $a$  to its new  
675  $i$ -th neighbor  $b_i$  is more than  $|a - a_i| + 2\varepsilon$ . □

676 **Lemma C.2.** For  $\varepsilon > 0$ , let  $g : S \rightarrow Q$  be a bijection between finite or periodic sets so that  
677  $|a - g(a)| \leq \varepsilon$  for all  $a \in S$ . Then  $g$  changes the vector  $\vec{R}_a(S) = (|a - a_1|, \dots, |a - a_k|)$  of the  
678 first  $k$  minimum distances from any point  $a \in S$  to its  $k$  nearest neighbors  $a_1, \dots, a_k \in S$  by at most  
679  $2\varepsilon$  in the  $L_\infty$ -distance. So if  $b_1, \dots, b_k \in Q$  are the  $k$  nearest neighbors of  $b = g(a)$  within  $Q$  and  
680  $\vec{R}_b(Q) = (|b - b_1|, \dots, |b - b_k|)$  is the vector of the first  $k$  minimum distances from  $b = g(a)$ , then  
681 the  $L_\infty$ -distance  $|\vec{R}_a(S) - \vec{R}_b(Q)|_\infty \leq 2\varepsilon$ . ■

682 *Proof.* By Lemma C.1 every coordinate of the vector  $\vec{R}_a(S)$  changes by at most  $2\varepsilon$ . Hence the  
683  $L_\infty$ -distance from  $\vec{R}_a(S)$  to the perturbed vector  $\vec{R}_b(Q)$  is at most  $2\varepsilon$ . □

684 *Proof of Theorem 4.3.* The bottleneck distance is  $d_B(S, Q) = \inf_{g:S \rightarrow Q} \sup_{a \in S} |a - g(a)|$  between point  
685 sets  $S, Q$ . Then for any  $\delta > 0$  there is a bijection  $g : S \rightarrow Q$  such that  $\sup_{a \in S} |a - g(a)| \leq d_B(S, Q) + \delta$ .  
686 If the given sets  $S, Q$  are finite, one can set  $\delta = 0$ . Indeed, there are only finitely many bijections  
687  $S \rightarrow Q$ , hence the infimum in the definition above is achieved for one of them.

688 By [21, Lemma 4.1], if the sets  $S, Q$  are periodic, they have a common lattice  $\Lambda$ . Any primitive cell  
689  $U$  of  $\Lambda$  is a unit cell of  $S, Q$ , i.e.  $S = \Lambda + (S \cap U)$  and  $Q = \Lambda + (Q \cap U)$ . Since the bottleneck  
690 distance  $\varepsilon = d_B(S, Q) < \frac{r(S)}{4}$ , we can define a bijection  $g$  from every point  $a \in S$  to a closest point  
691  $g(a) \in Q$ . If  $U$  is a non-primitive unit cell of  $S$ , the distance matrix  $D(S; k)$  can be constructed as  
692 in Definition 3.1, but each row will be repeated  $n(S)$  times, where  $n(S)$  is  $\text{Vol}[U]$  divided by the  
693 volume of a primitive unit cell of  $S$ . So we can assume that  $S, Q$  share a unit cell  $U$  and have in  
694  $U$  the same number  $m(S) = m(Q)$ , say both are equal to  $m$ . For any  $k \geq 1$ , we first define the  
695 simple 1-1 flow from the rows of  $D(S; k)$  to the rows of  $D(Q; k)$  by setting  $f_{ii} = \frac{1}{m}$  and  $f_{ij} = 0$   
696 for  $i \neq j$ , where  $i, j = 1, \dots, m$ . Recall that Definition 3.1 collapses all rows of  $D(S; k)$  that are  
697 identical to each other to a single row, similar for  $D(Q; k)$ . By summing up weights of collapsed  
698 rows, the above flow induces a flow from all distance vectors in  $\text{PDD}(S; k)$ , e.g.  $R_i(S)$  in the  $i$ -th  
699 row of  $\text{PDD}(S; k)$ , to all distance vectors in  $\text{PDD}(Q; k)$ .

700 Then  $\text{EMD}(\text{PDD}(S; k), \text{PDD}(Q; k)) \leq \frac{1}{m} \sum_{i=1}^m |\vec{R}_i(S) - \vec{R}_i(Q)|_\infty$ , because EMD minimizes the  
701 cost over all flows in Definition 4.1. Since  $|\vec{R}_i(S) - \vec{R}_i(Q)| \leq 2(d_B(S, Q) + \delta)$  by Lemma C.2, we  
702 get  $\text{EMD}(\text{PDD}(S; k), \text{PDD}(Q; k)) \leq \frac{1}{m} \sum_{i=1}^m 2(d_B(S, Q) + \delta) = 2(d_B(S, Q) + \delta)$ . Since the last  
703 inequality holds for any small  $\delta > 0$ , we get  $\text{EMD}(\text{PDD}(S; k), \text{PDD}(Q; k)) \leq 2d_B(S, Q)$ . □

704 For any point  $p$  in a lattice  $\Lambda \subset \mathbb{R}^n$ , the open Voronoi domain  $V(\Lambda; p) = \{q \in \mathbb{R}^n \mid |q - p| <$   
705  $|q - p'|\text{ for any } p' \in \Lambda - p\}$  is the neighborhood of all points  $q \in \mathbb{R}^n$  that are strictly close to  $p$  than  
706 to all other points  $p'$  of the lattice  $\Lambda$  [22].

707 The Voronoi domains  $V(\Lambda; p)$  of different points  $p \in \Lambda$  are disjoint translation copies of each other  
 708 and their closures tile  $\mathbb{R}^n$ , so  $\cup_{p \in \Lambda} \bar{V}(\Lambda; p) = \mathbb{R}^n$ .

709 For a generic lattice  $\Lambda \subset \mathbb{R}^2$ ,  $V(\Lambda; p)$  is a centrally symmetric hexagon. Points  $p, p' \in \Lambda$  are Voronoi  
 710 neighbors if their Voronoi domains share a boundary point, so  $\bar{V}(\Lambda; p) \cap \bar{V}(\Lambda; p') \neq \emptyset$ .

711 Below we always assume that any lattice  $\Lambda$  is shifted to contain the origin 0, also any periodic point  
 712 set  $S = \Lambda + M$  has a point at 0.

713 **Definition C.3** (neighbor set  $N(\Lambda)$  and basis distances). *For any lattice  $\Lambda \subset \mathbb{R}^n$ , the neighbor set (of*  
 714 *the origin 0) is  $N(\Lambda) = \Lambda \cap \bar{B}(0; r) - \{0\}$  for a minimum radius  $r$  such that  $N(\Lambda)$  is not contained*  
 715 *in any affine  $(n - 1)$ -dimensional subspace of  $\mathbb{R}^n$  and  $N(\Lambda)$  includes all  $n + 1$  nearest neighbors*  
 716 *(within  $\Lambda$ ) of any point  $q \in V(\Lambda; p)$ .*

717 *For any point  $q \in V(\Lambda; 0)$ , consider all  $n$ -tuples  $(p_1, \dots, p_n)$  of points  $p_i \in N(\Lambda)$  such that the*  
 718 *vectors  $\vec{p}_1, \dots, \vec{p}_n$  form a linear basis of  $\mathbb{R}^n$ . Order  $p_1, \dots, p_n$  by their distances to  $q$ . Choose*  
 719 *a lexicographically smallest list of basis distances  $d_1(q) \leq \dots \leq d_n(q)$  from the point  $q$  over all*  
 720  *$n$ -tuples  $(p_1, \dots, p_n)$  described above. ■*

721 The lattice  $\mathbb{Z}^2$  has the neighbor set  $N(\mathbb{Z}^2) = \{(\pm 1, 0), (0, \pm 1)\}$ . If  $\Lambda$  is generated by  $(2, 0), (0, 1)$ ,  
 722 the neighbor set  $N(\Lambda) \subset \Lambda$  includes the 3rd neighbors  $(0, \pm 2)$  of the points  $(0, \pm 0.4) \in V(\Lambda; 0)$ .

723 Indeed, if Definition C.3 has a radius  $r < 2$ , then  $\Lambda \cap \bar{B}(0; r) - \{0\} = \{(0, \pm 1)\}$  but the  $y$ -axis  
 724 does not generate  $\mathbb{R}^2$ . For  $q = (0, 0.4)$ , considering all pairs  $(p_1, p_2)$  among the four possibilities  
 725  $((0, \pm 1), (\pm 2, 0))$ , we find the basis distances  $d_1(q) = 0.6 < d_2(q) = \sqrt{0.4^2 + 2^2}$  for the 2nd and  
 726 3rd lattice neighbors  $p_1 = (0, 1)$  and  $p_2 = (\pm 2, 0)$  of  $q$ .

727 **Lemma C.4** ( $N(\Lambda)$  bounds). *The neighbor set  $N(\Lambda)$  of any lattice  $\Lambda$  is covered by  $\bar{B}(0; 2R(\Lambda))$ ,*  
 728 *where the packing radius  $R(\Lambda)$  is the minimum  $R > 0$  such that  $\cup_{p \in \Lambda} \bar{B}(p; R) = \mathbb{R}^n$ . ■*

729 *Proof of Lemma C.4.* Any point  $p$  in the closure  $\bar{V}(\Lambda; 0)$  has  $n + 1$  lattice neighbors (within  $\Lambda$ )  
 730 among the origin  $0 \in \Lambda$  and at least  $2(2^n - 1)$  Voronoi neighbors of 0.

731 In  $\mathbb{R}^n$ , any vertex of the boundary of  $\bar{V}(\Lambda; 0)$  is equidistant to at least  $n + 1$  points of  $\Lambda$  (the origin 0  
 732 and its  $n$  Voronoi neighbors). The longest of these distances is the covering radius  $R(\Lambda)$ . The closed  
 733 ball  $\bar{B}(0; 2R(\Lambda))$  covers all Voronoi neighbors of 0, hence all points of  $N(\Lambda)$ . □

734 The condition of a linear basis in Definition C.3 guarantees that  $n + 1$  linearly independent vectors  
 735  $\vec{p}_1, \dots, \vec{p}_n$  uniquely identify a point  $q$  by their basis distances  $d_1(q), \dots, d_n(q)$ .

736 **Definition C.5** (a distance-generic periodic point set). *A periodic point set  $S = \Lambda + M \subset \mathbb{R}^n$  with*  
 737 *the origin  $0 \in \Lambda \subset S$  is called distance-generic if the following conditions hold.*

738 (C.5a)  $\vec{p}, \vec{q}$  are not orthogonal for any points  $p, q \in S \cap V(\Lambda; 0)$ .

739 (C.5b) For any vectors  $\vec{u}, \vec{v}$  between any two pairs of points in  $S$ , if  $|\vec{u}| = l|\vec{v}| \leq 2R(\Lambda)$  for  $l = 1, 2$ ,  
 740 then  $\vec{u} = \pm l\vec{v}$  and  $\vec{v} \in \Lambda$ .

741 (C.5c) For any point  $q \in V(\Lambda; 0)$ , let  $d_0$  be the distance from  $q$  to its closest neighbor  $p_0 = 0$  within  
 742  $\Lambda$ . Take any  $p_1, \dots, p_n$  in the neighbor set  $N(\Lambda)$  with distances  $d_1 \leq \dots \leq d_n$  to  $q$ .

743 *The  $n + 1$  spheres  $C(p_i; d_i)$  with the centers  $p_i$  and radii  $d_i$ ,  $i = 0, \dots, n$ , can meet at the single*  
 744 *point  $q \in V(\Lambda; 0)$  only if  $d_1 \leq \dots \leq d_n$  are the basis distances of  $q$ , hence  $\vec{p}_1, \dots, \vec{p}_n$  form a linear*  
 745 *basis of  $\mathbb{R}^n$ , only for at most two tuples  $p_1, \dots, p_n \in N(\Lambda)$  symmetric in 0. ■*

746 Condition (C.5b) means that all inter-point distances are distinct apart from necessary exceptions due  
 747 to periodicity. Since any periodic set  $S = \Lambda + M \subset \mathbb{R}^n$  is invariant under translations along vectors  
 748 of its lattices  $\Lambda$ , condition (C.5b) for  $|\vec{v}| \leq 2\text{diam}[U]$  can be checked only for vectors from all points  
 749 in the Voronoi domain  $V(\Lambda; 0)$  to all points in the extended domain  $3V(\Lambda; 0)$ .

750 Condition (C.5b) allows us to recognize *lattice distances* from any point  $p \in M$  to its lattice translates  
 751  $\Lambda + p$  in the row of  $\text{PDD}(S; k)$  representing  $p$ . Indeed, only a lattice distance  $d$  appears in the row

752 together with  $2d$  (and possibly with higher multiples) by condition (C.5b). Any lattice distance  $d$  and  
 753 its multiple are repeated twice in every row, because any lattice is centrally symmetric.

754 All conditions of Definition C.5 can be written as algebraic equations via coordinates of motif points  
 755 and basis vectors of a unit cell. Almost all  $n + 1$  spheres in  $\mathbb{R}^n$  have no common points, so condition  
 756 (C.5c) forbids very singular situations, which can be practically checked since the neighbor set  $N(\Lambda)$   
 757 is finite for any lattice  $\Lambda$  containing 0. Hence any periodic point set can be made distance-generic by  
 758 almost any perturbation of points and lattice basis.

759 *Proof of Theorem 4.4.* Assuming that  $\text{PDD}(S; k)$  is realizable by a periodic point set  $S = \Lambda + M$ ,  
 760 we will reconstruct all motif points  $p \in V(\Lambda; 0)$ , uniquely up to the central symmetry of  $\mathbb{R}^n$  with  
 761 respect to 0. The given number  $m$  of points in a unit cell  $U$  of  $S$  is a common multiple of all  
 762 denominators in rational weights of the rows in the given matrix  $\text{PDD}(S; k)$ . Enlarge  $\text{PDD}(S; k)$   
 763 replacing every row of a weight  $w$  by  $mw$  identical rows of weight  $\frac{1}{m}$ .

764 One can assume that the origin  $0 \in \Lambda$  belongs to the motif  $M$  of  $S$  and is represented by the first  
 765 row of  $\text{PDD}(S; k)$ . If  $\text{PDD}(S; k)$  has  $m \geq 2$  rows, we will reconstruct all other  $m - 1$  points of  $S$   
 766 within the open Voronoi domain  $V(\Lambda; 0)$ . No points of  $S$  can be on the boundary of  $V(\Lambda; 0)$  due to  
 767 condition (C.5b) on distinct distances.

768 Remove from each row of  $\text{PDD}(S; k)$  all *lattice distances* between any points of  $\Lambda$ . Then every  
 769 remaining distance is between only points  $p, q \in S$  such that  $p - q \notin \Lambda$ . Any point  $q \in S \cap V(\Lambda; 0) -$   
 770  $\{0\}$  has its first lattice neighbour 0 at the distance  $d_0 = |q|$  and a lexicographically smallest list of basis  
 771 distances  $d_1(q) < \dots < d_n(q)$  from  $q$  to its further  $n$  lattice neighbors  $p_1, \dots, p_n \in N(\Lambda) \subset \Lambda - 0$   
 772 such that the vectors  $\vec{p}_1, \dots, \vec{p}_n$  form a basis of  $\mathbb{R}^n$ . All basis distances are distinct due to (C.5b). By  
 773 Lemma C.4 they appear once in both rows of the points  $0, q \in S$  in  $\text{PDD}(S; k)$  after  $d_0 = |q|$ .

774 Though the basis distances of  $q$  may not be the  $n$  smallest values appearing after  $d_0 = |q|$  in the first  
 775 and second rows of 0 and  $q$ , we will try all  $n$ -distance subsequences  $d'_1 < \dots < d'_n$  shared by both  
 776 rows. Similarly, we cannot be sure that  $n + 1$  closest neighbors of  $q$  in  $\Lambda$  form an affine basis of  $\mathbb{R}^n$ .  
 777 Hence we try all  $n$ -tuples of points  $p_1, \dots, p_n \in N(\Lambda; 0)$  whose vectors form a linear basis of  $\mathbb{R}^n$ .

778 For all finitely many choices above, we check if the  $n + 1$  spheres  $S(p_i; d'_i)$ , which are 1D circles  
 779 (for  $n = 2$ ) or 2D spheres (for  $n = 3$ ), meet at a single point in  $V(\Lambda; 0)$ , which is the reconstructed  $q$ .

780 Condition (C.5c) guarantees that these  $n + 1$  spheres can intersect at a single point in the open  
 781 Voronoi domain  $V(\Lambda; 0)$  only if the three conditions of Definition C.5 hold. Firstly, the vectors  
 782  $\vec{p}_1, \dots, \vec{p}_n$  should form a linear basis of  $\mathbb{R}^n$ . Secondly, if some distances  $d_1 < \dots < d_n$  are the  
 783 basis distances from  $q$  to  $p_1, \dots, p_n$  only if this list is the lexicographically smallest over all tuples  
 784  $\{p_1, \dots, p_n\} \subset N(\Lambda)$  that form a linear basis. Thirdly, the single-point intersection happens only for  
 785 two subsets  $\{p_1, \dots, p_n\} \subset N(\Lambda)$  related by the central symmetry with respect to 0. This symmetry  
 786 is an isometry preserving the lattice  $\Lambda$  and the distances  $d_0 < d_1 < \dots < d_n$ . Making a choice by  
 787 this inevitable ambiguity, we uniquely identify a point  $q \in S \cap V(\Lambda; 0) - \{0\}$  relative to the fixed  $\Lambda$ .

788 If the matrix  $\text{PDD}(S; k)$  has  $m \geq 3$  rows, any further point  $p \in (S - \{0, q\}) \cap V(\Lambda; 0)$  will be  
 789 uniquely determined as follows. Similarly to the point  $q$  above, we determine a position of  $p$  using its  
 790 basis distances  $d_0(p) < d_1(p) < \dots < d_n(p)$  to points  $0 = p_0, p_1, \dots, p_n \in N(\Lambda)$ . At the end of  
 791 reconstruction, we have a final choice between  $\pm p$  symmetric with respect to the origin 0.

792 Since the second point  $q$  is already fixed, the third point  $p$  is also restricted by the distance  $|p - q|$   
 793 appearing once only in the second and third rows of  $\text{PDD}(S; k)$ . The distance  $|p - q|$  doesn't help to  
 794 resolve the ambiguity between  $\pm p$  only if  $q$  belongs to the bisector of points equidistant to  $\pm p$ . In  
 795 this case,  $p, 0, q$  form a right-angle triangle, which is forbidden by condition (C.5a). Hence  $p$  and any  
 796 further point of  $S \cap V(\Lambda; 0)$  is uniquely determined by  $q$  and  $\Lambda$ .  $\square$

797 *Proof of Theorem 5.1.* It follows from [25, Theorem 14], which finds  $k$  nearest neighbors of  $m$  points  
 798 in (a motif of)  $S$  before averaging these  $k$ -th distances for  $\text{AMD}(S; k)$ . Instead of averaging, to  
 799 get  $\text{PDD}(S; k)$ , it remains only need to lexicographically sort  $m$  lists of ordered distances in time  
 800  $O(km \log m)$ . Indeed, a comparison of two ordered lists of the length  $k$  takes  $O(k)$  time.  $\square$

## References

- [1] LC Andrews, HJ Bernstein, and GA Pelletier. A perturbation stable cell comparison technique. *Acta Crystallographica Section A*, 36(2):248–252, 1980.
- [2] O Anosova and V Kurlin. Introduction to periodic geometry and topology. *arXiv:2103.02749*, 2021.
- [3] O Anosova and V Kurlin. An isometry classification of periodic point sets. In *Proceedings of Discrete Geometry and Mathematical Morphology*, 2021.
- [4] Albert P Bartók, Risi Kondor, and Gábor Csányi. On representing chemical environments. *Physical Review B*, 87(18):184115, 2013.
- [5] Jörg Behler. Atom-centered symmetry functions for constructing high-dimensional neural network potentials. *The Journal of chemical physics*, 134(7):074106, 2011.
- [6] Serge Belongie, Jitendra Malik, and Jan Puzicha. Shape matching and object recognition using shape contexts. *Transactions PAMI*, 24(4):509–522, 2002.
- [7] David Bimler. Better living through coordination chemistry: A descriptive study of a prolific papermill that combines crystallography and medicine. 2022.
- [8] M. Bouniaev and N. Dolbilin. Regular and multi-regular t-bonded systems. *J. Information Processing*, 25:735–740, 2017.
- [9] M. Boutin and G. Kemper. On reconstructing n-point configurations from the distribution of distances or areas. *Adv. Appl. Math.*, 32(4):709–735, 2004.
- [10] Peter Brass and Christian Knauer. Testing the congruence of d-dimensional point sets. In *Proceedings of SoCG*, pages 310–314, 2000.
- [11] Matthew Bright, Andrew I Cooper, and Vitaliy Kurlin. Geographic-style maps for 2-dimensional lattices. *arxiv:2109.10885*, 2021.
- [12] Mathew J. Bryant, Simon N. Black, Helen Blade, Robert Docherty, Andrew G.P. Maloney, and Stefan C. Taylor. The csd drug subset: The changing chemistry and crystallography of small molecule pharmaceuticals. *Journal of Pharmaceutical Sciences*, 108(5):1655–1662, 2019.
- [13] J. Chisholm and S. Motherwell. Compack: a program for identifying crystal structure similarity using distances. *J. Applied Crystal.*, 38:228–231, 2005.
- [14] Scott Cohen and Leonidas Guibas. The earth mover’s distance: Lower bounds and invariance under translation. Technical report, Stanford University, 1997.
- [15] J Conway and N Sloane. Low-dimensional lattices. vi. voronoi reduction of three-dimensional lattices. *Proceedings Royal Society A*, 436(1896):55–68, 1992.
- [16] William IF David, Kenneth Shankland, Ch Baerlocher, LB McCusker, et al. *Structure determination from powder diffraction data*, volume 13. 2002.
- [17] de Pablo et L. New frontiers for the materials genome initiative. *npj Computational Materials*, 5(1):1–23, 2019.
- [18] N Dolbilin and M Bouniaev. Regular t-bonded systems in  $\mathbb{R}^3$ . *European Journal of Combinatorics*, 80:89–101, 2019.
- [19] N. Dolbilin, J Lagarias, and M. Senechal. Multiregular point systems. *Discrete & Computational Geometry*, 20(4):477–498, 1998.
- [20] N Dym and S Kovalsky. Linearly converging quasi branch and bound algorithms for global rigid registration. In *Proceedings ICCV*, pages 1628–1636, 2019.
- [21] H Edelsbrunner, T Heiss, V Kurlin, P Smith, and M Wintraecken. The density fingerprint of a periodic point set. In *Proceedings of SoCG*, pages 32:1–32:16, 2021.

- [22] Herbert Edelsbrunner and Raimund Seidel. Voronoi diagrams and arrangements. *Discrete & Computational Geometry*, 1(1):25–44, 1986.
- [23] A Pulido et al. Functional materials discovery using energy–structure maps. *Nature*, 543:657–664, 2017.
- [24] C Groom et al. The cambridge structural database. *Acta Cryst B*, 72(2):171–179, 2016.
- [25] D Widdowson et al. Average minimum distances of periodic point sets. *MATCH Communications in Math. Comp. Chemistry*, 87:529–559, 2022.
- [26] H Maron et al. Point registration via efficient convex relaxation. *ACM Trans. on Graphics*, 35(4):1–12, 2016.
- [27] H Pottmann et al. Integral invariants for robust geometry processing. *Comp. Aided Geom. Design*, 26(1):37–60, 2009.
- [28] Hans-Georg Carstens et al. Geometrical bijections in discrete lattices. *Combinatorics, Probability and Computing*, 8:109–129, 1999.
- [29] J Yang et al. Go-icp: A globally optimal solution to 3d icp point-set registration. *Transactions PAMI*, 38:2241–2254, 2015.
- [30] R Sato et al. Fast and robust comparison of probability measures in heterogeneous spaces. *arXiv:2002.01615*, 2020.
- [31] S Manay et al. Integral invariants for shape matching. *Transactions PAMI*, 28(10):1602–1618, 2006.
- [32] S Pozdnyakov et al. Incompleteness of atomic structure representations. *Phys. Rev. Lett.*, 125:166001, 2020.
- [33] Y Aflalo et al. On convex relaxation of graph isomorphism. *Proceedings of the National Academy of Sciences*, 112(10):2942–2947, 2015.
- [34] Giuseppe Fadda and Giovanni Zanzotto. On the arithmetic classification of crystal structures. *Acta Cryst. A: Foundations*, 57(5):492–506, 2001.
- [35] Cosmin Grigorescu and Nicolai Petkov. Distance sets for shape filters and shape recognition. *IEEE transactions on image processing*, 12(10):1274–1286, 2003.
- [36] Grünbaum and Moore. The use of higher-order invariants in the determination of generalized Patterson cyclotomic sets. *Acta Cryst A*, 51:310–323, 1995.
- [37] T Hahn, U Shmueli, and J Arthur. *Internat. tables for crystallography*, volume 1. 1983.
- [38] Maria Angeles Junquera Pulido, Linjiang Chen, Tomasz Kaczorowski, Daniel Holden, Marc A Little, Samantha Y Chong, Benjamin J Slater, David McMahon, Baltasar Bonillo, Chloe J Stackhouse, et al. Additional computational data (related to "functional materials discovery using energy–structure–function maps" manuscript). 2017.
- [39] Heuna Kim and Günter Rote. Congruence testing of point sets in 4 dimensions. *arXiv:1603.07269*, 2016.
- [40] V Kurlin. Mathematics of 2-dimensional lattices, 2022.
- [41] Vitaliy Kurlin. Density functions of periodic sequences. *arxiv:2205.02226*, 2022.
- [42] Leland McInnes, John Healy, and James Melville. Umap: Uniform manifold approximation and projection for dimension reduction. *arXiv:1802.03426*, 2018.
- [43] Facundo Mémoli. Gromov–wasserstein distances and the metric approach to object matching. *Foundations of Comp. Mathematics*, 11(4):417–487, 2011.
- [44] M Mosca and V Kurlin. Voronoi-based similarity distances between arbitrary crystal lattices. *Crystal Research and Technology*, 55(5):1900197, 2020.

- 889 [45] Robert Osada, Thomas Funkhouser, Bernard Chazelle, and David Dobkin. Shape distributions.  
890 *ACM Transactions on Graphics (TOG)*, 21(4):807–832, 2002.
- 891 [46] Behnam Parsaeifard and Stefan Goedecker. Manifolds of quasi-constant soap and acsf finger-  
892 prints and the resulting failure to machine learn four-body interactions. *The Journal of Chemical*  
893 *Physics*, 156(3):034302, 2022.
- 894 [47] A Patterson. Ambiguities in the x-ray analysis of structures. *Phys. Rev.*, 65:195–201, 1944.
- 895 [48] AL Patterson. Homometric structures. *Nature*, 143:939–940, 1939.
- 896 [49] Sergey N Pozdnyakov and Michele Ceriotti. Incompleteness of graph convolutional neural  
897 networks for points clouds in three dimensions. *arXiv:2201.07136*, 2022.
- 898 [50] Daniel Probst and Jean-Louis Reymond. Visualization of very large high-dimensional data sets  
899 as minimum spanning trees. *Cheminformatics*, 12:1–13, 2020.
- 900 [51] Joseph Rosenblatt and Paul D Seymour. The structure of homometric sets. *SIAM Journal on*  
901 *Algebraic Discrete Methods*, 3(3):343–350, 1982.
- 902 [52] Y. Rubner, C. Tomasi, and L. Guibas. The earth mover’s distance as a metric for image retrieval.  
903 *Intern. Journal of Computer Vision*, 40(2):99–121, 2000.
- 904 [53] Mauro R Ruggeri and Dietmar Saupe. Isometry-invariant matching of point set surfaces. In  
905 *3DOR*, pages 17–24. Citeseer, 2008.
- 906 [54] Pietro Sacchi, Matteo Lusi, Aurora J Cruz-Cabeza, Elisa Nauha, and Joel Bernstein. Same  
907 or different—that is the question: identification of crystal forms from crystal structure data.  
908 *CrystEngComm*, 22(43):7170–7185, 2020.
- 909 [55] N Shervashidze. Weisfeiler-lehman graph kernels. *J. Machine Learning Research*, 12(9), 2011.
- 910 [56] S Shirdhonkar and D Jacobs. Approximate earth mover’s distance in linear time. In *Conference*  
911 *on Computer Vision and Pattern Recognition*, pages 1–8, 2008.
- 912 [57] ALJ Spek. Single-crystal structure validation with the program platon. *Journal of applied*  
913 *crystallography*, 36(1):7–13, 2003.
- 914 [58] Maxwell W Terban and Simon JL Billinge. Structural analysis of molecular materials using the  
915 pair distribution function. *Chemical Reviews*, 122:1208–1272, 2022.
- 916 [59] Laurens Van der Maaten and Geoffrey Hinton. Visualizing data using t-sne. *Journal of machine*  
917 *learning research*, 9(11), 2008.
- 918 [60] Peter Zwart, Ralf Grosse-Kunstleve, Andrey Lebedev, Garib Murshudov, and Paul Adams.  
919 Surprises and pitfalls arising from (pseudo) symmetry. *Acta Cryst. D*, 64:99–107, 2008.
